# Supplementary figures and images for: Arsenic trioxide-loaded nanoparticles enhance the chemosensitivity of gemcitabine in pancreatic cancer via the reversal of pancreatic stellate cell desmoplasia by targeting the AP4/galectin-1 pathway
Source: Royal Society of Chemistry journal article supplement (doi:10.1039/d2bm01039a), 2022-01-01

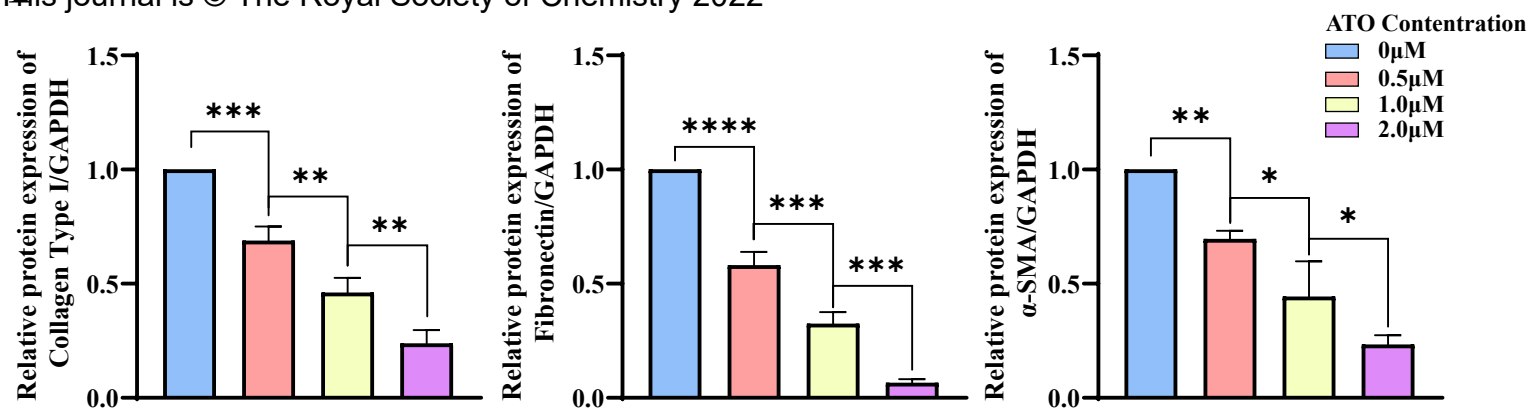

**B**

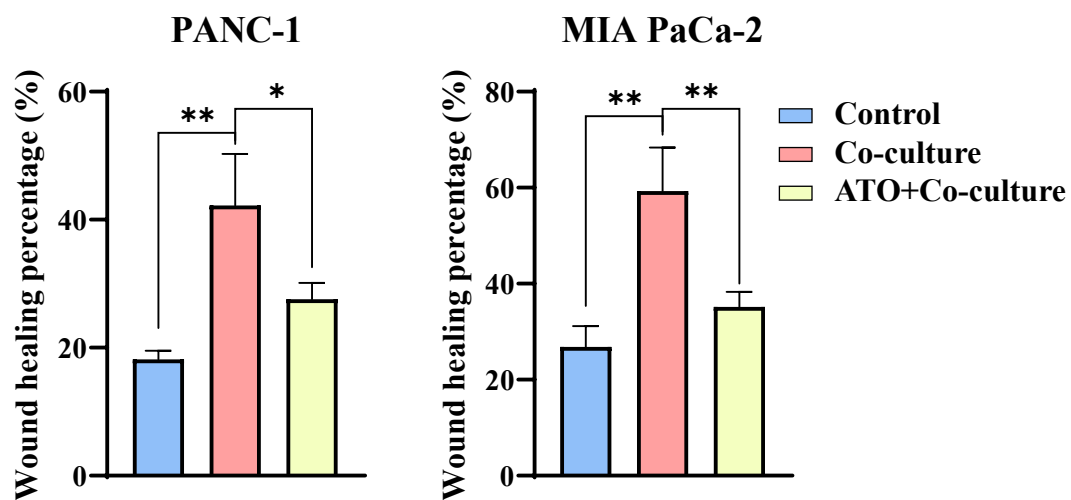

Supplement: d2bm01039a2.pdf [file d2bm01039a2.pdf]

**A**

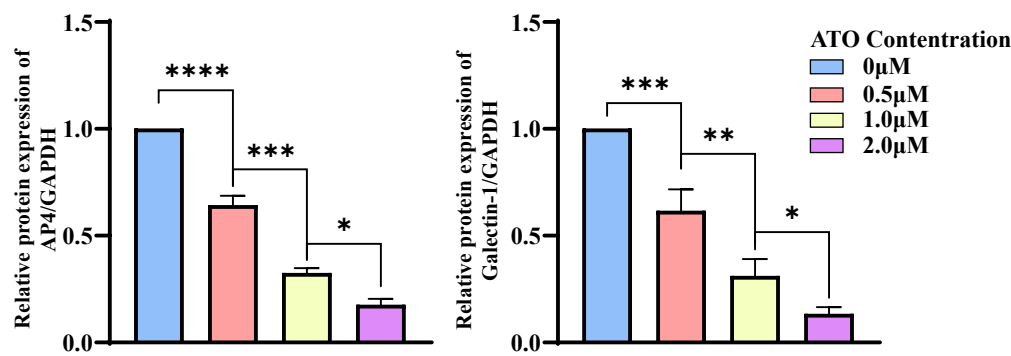

**B**

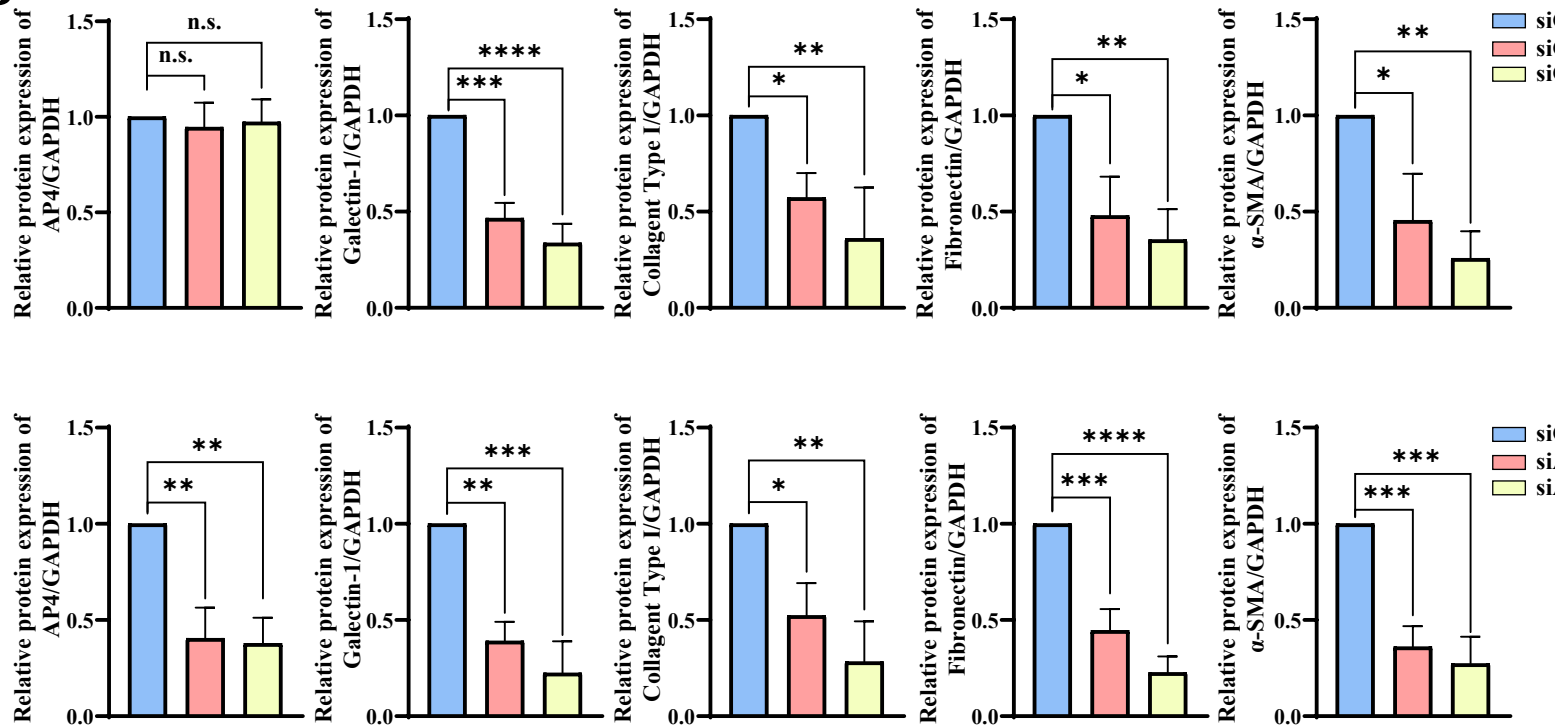

**C**

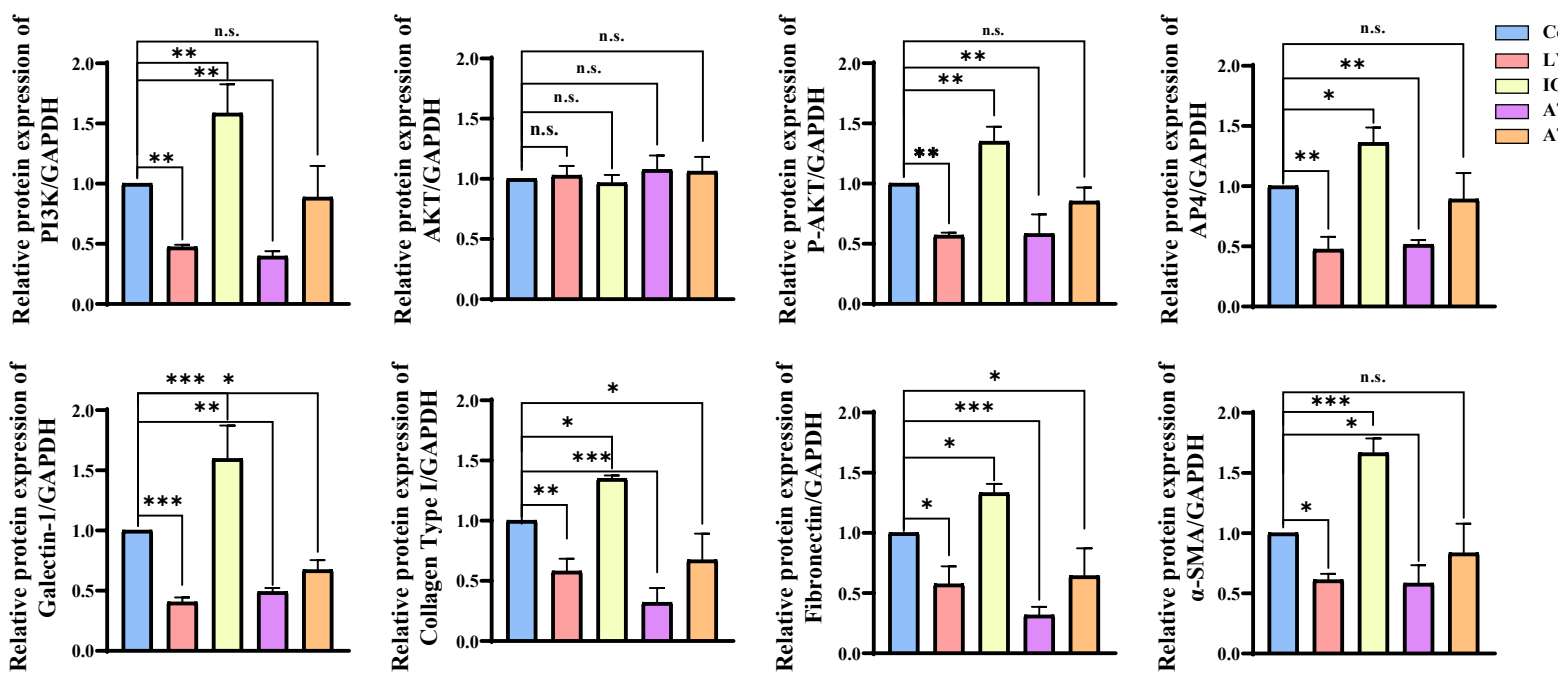

Supplement: d2bm01039a3.pdf [file d2bm01039a3.pdf]

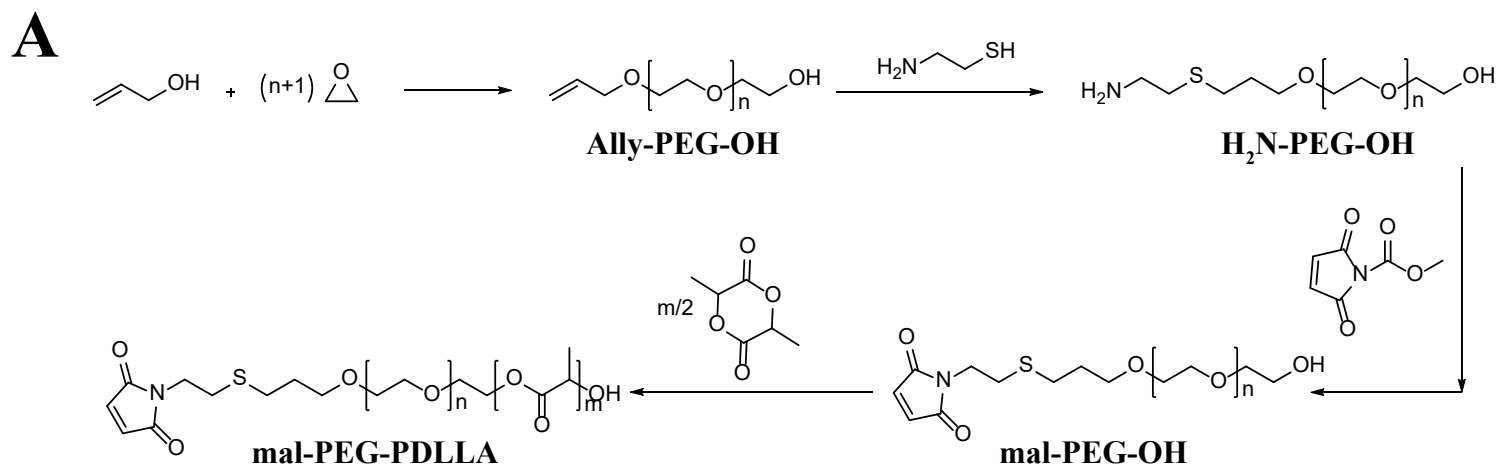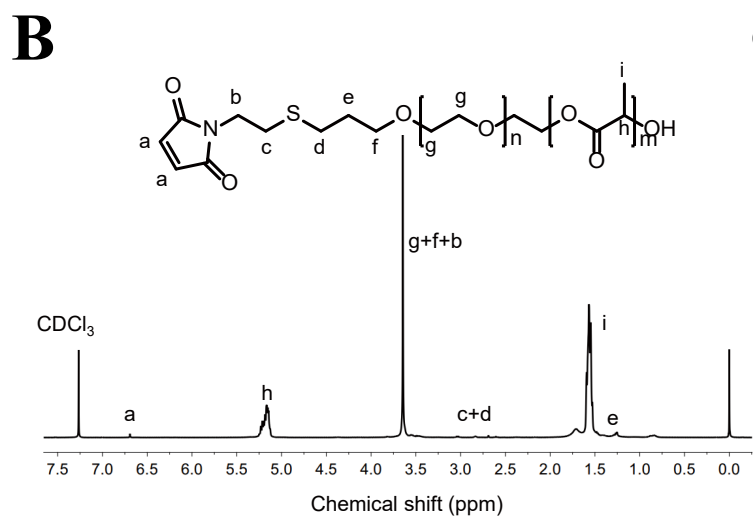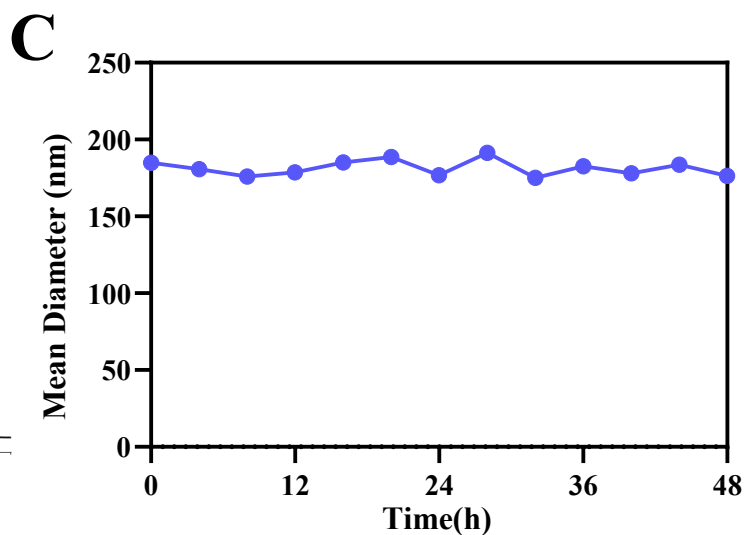

Supplement: d2bm01039a4.pdf [file d2bm01039a4.pdf]

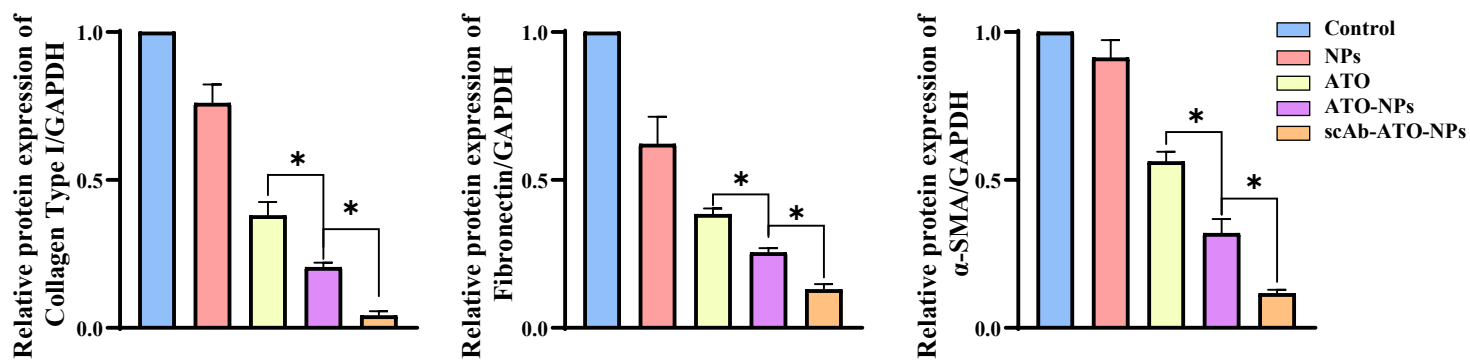

**B**

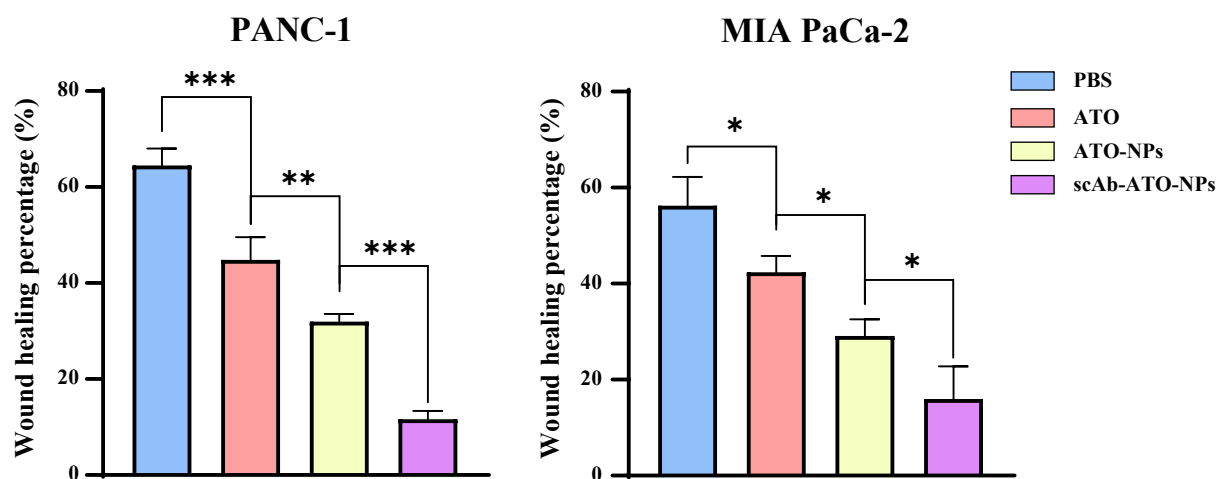

Supplement: d2bm01039a5.pdf [file d2bm01039a5.pdf]

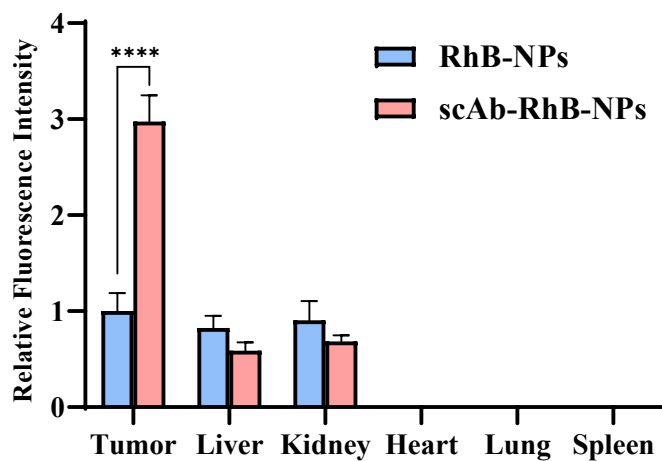

Supplement: d2bm01039a6.pdf [file d2bm01039a6.pdf]

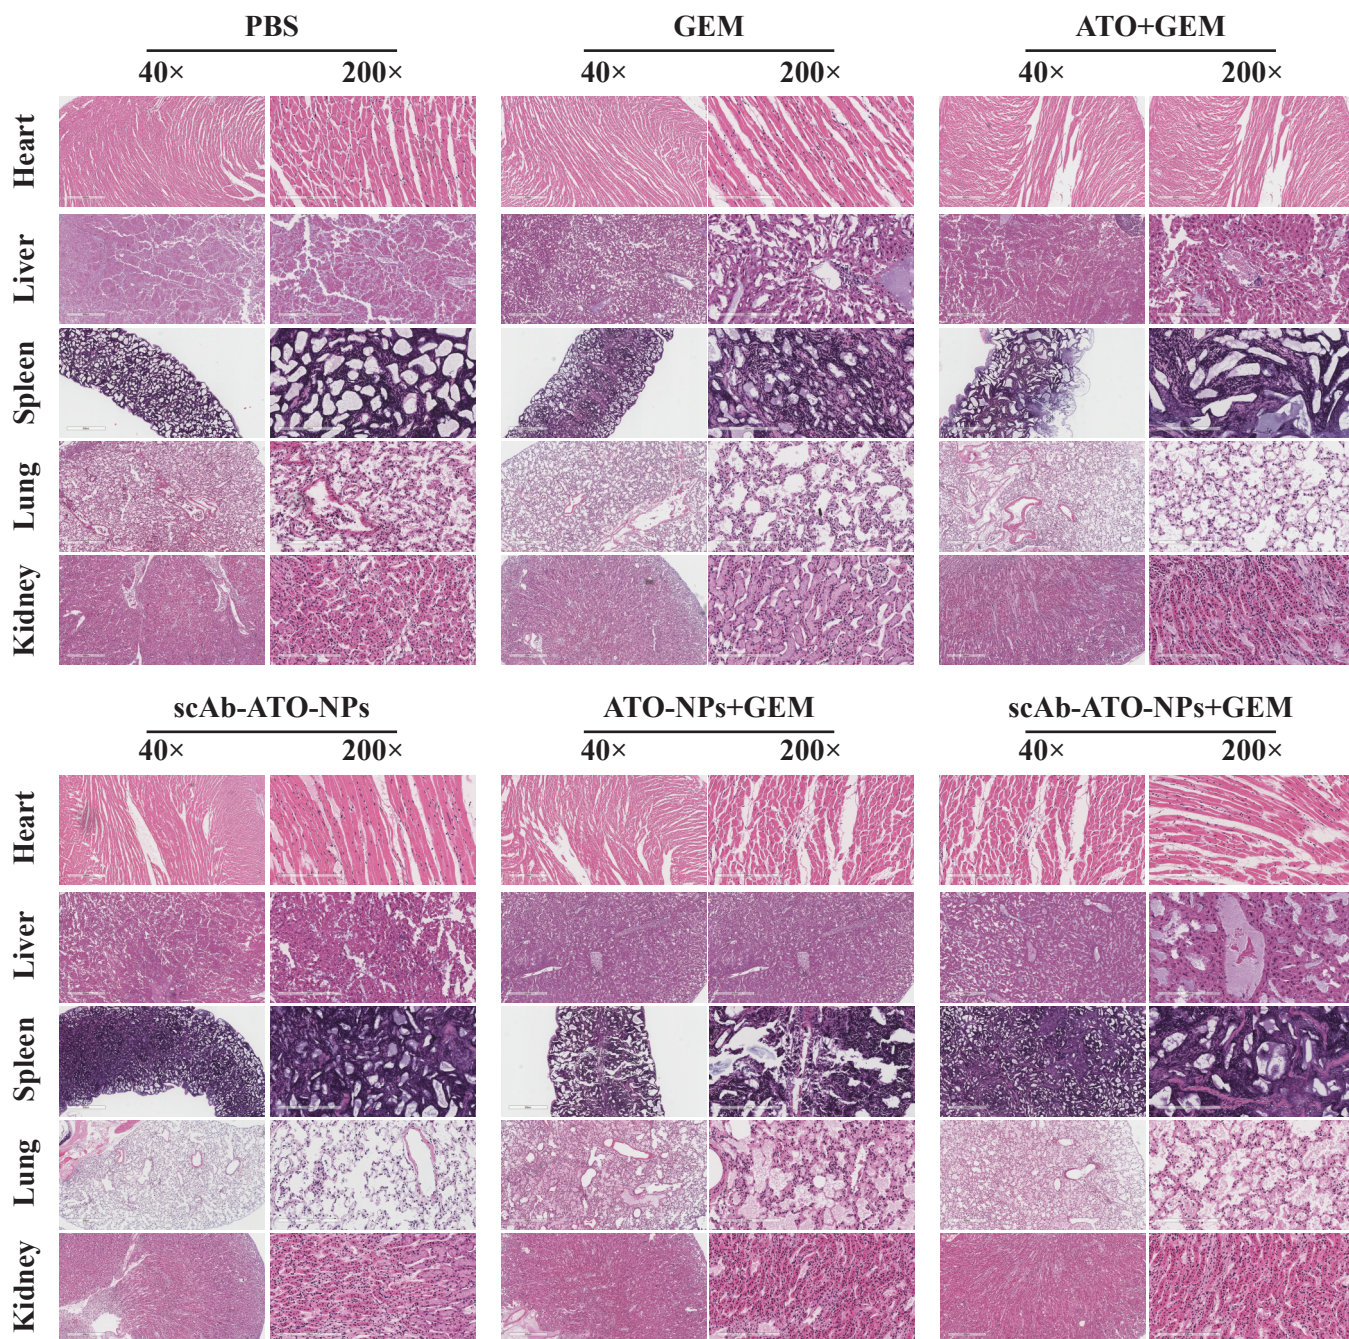

Supplement: d2bm01039a7.pdf [file d2bm01039a7.pdf]

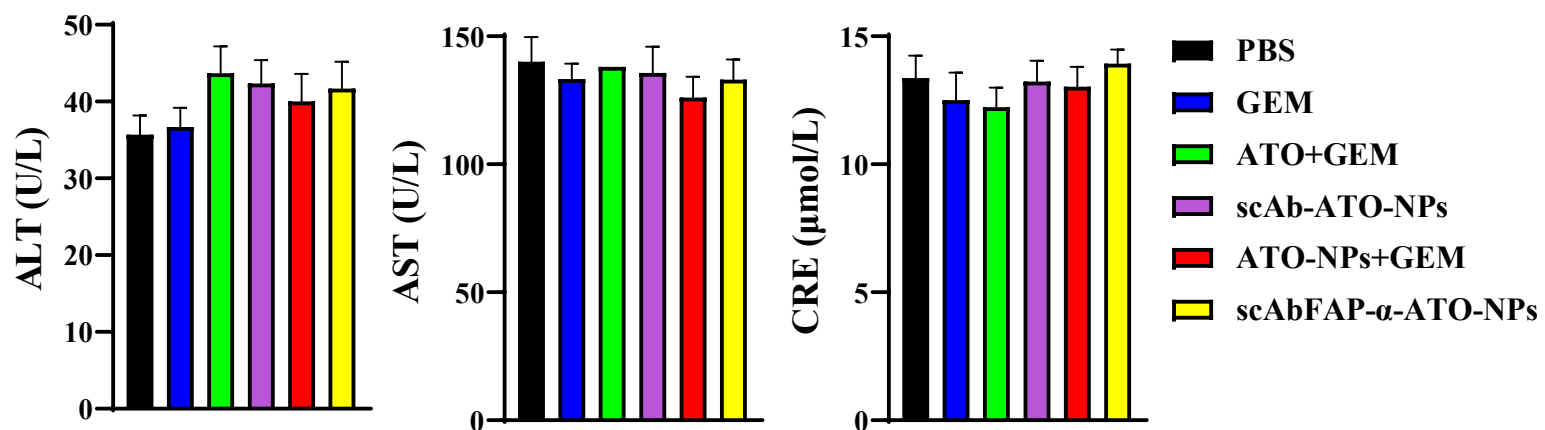

Supplement: d2bm01039a8.pdf [file d2bm01039a8.pdf]
